# Supplementary material
Source: publisher site journal article supplement (https://www.dovepress.com/article/329433)
Supplement: Supplementary file 1 [file get_supplementary_file.php]

**Supporting Information**

Phenylboronic acid-modified polyamidoamine-mediated the transfection of Polo-like kinase-1 siRNA to achieve an anti-tumor efficacy

Gu Gong,a,1 Xiuhui Tang,b,1 Jiayuan Zhang,b Xiao Liang,b

Jiebing Yang,b,* Quanshun Lib,*

*aDepartment of Orthopaedic Surgery, China-Japan Union Hospital, Jilin University, Changchun 130031, China*

*bKey Laboratory for Molecular Enzymology and Engineering of Ministry of Education, School of Life Sciences, Jilin University, Changchun 130012, China*

*Corresponding authors.

Tel. and Fax: +86-431-85155200.

E-mail: [quanshun@jlu.edu.cn](mailto:quanshun@jlu.edu.cn) (Q. Li); [yangjiebing@lntu.edu.cn](mailto:yangjiebing@lntu.edu.cn) (J. Yang).

1These authors contributed equally to the work.


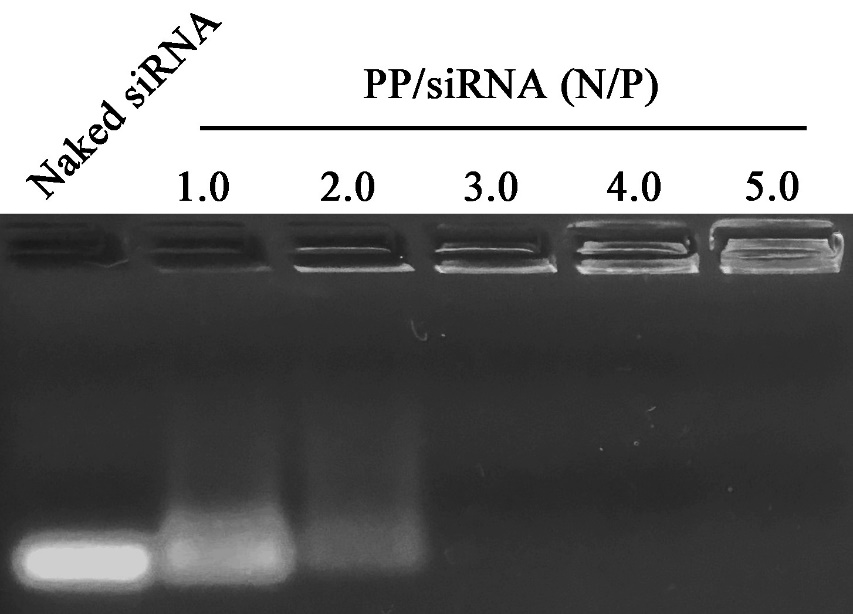


**Figure S1.** Gel retardation assay of PP/siPlk-1 nanoparticles at different N/P ratios.


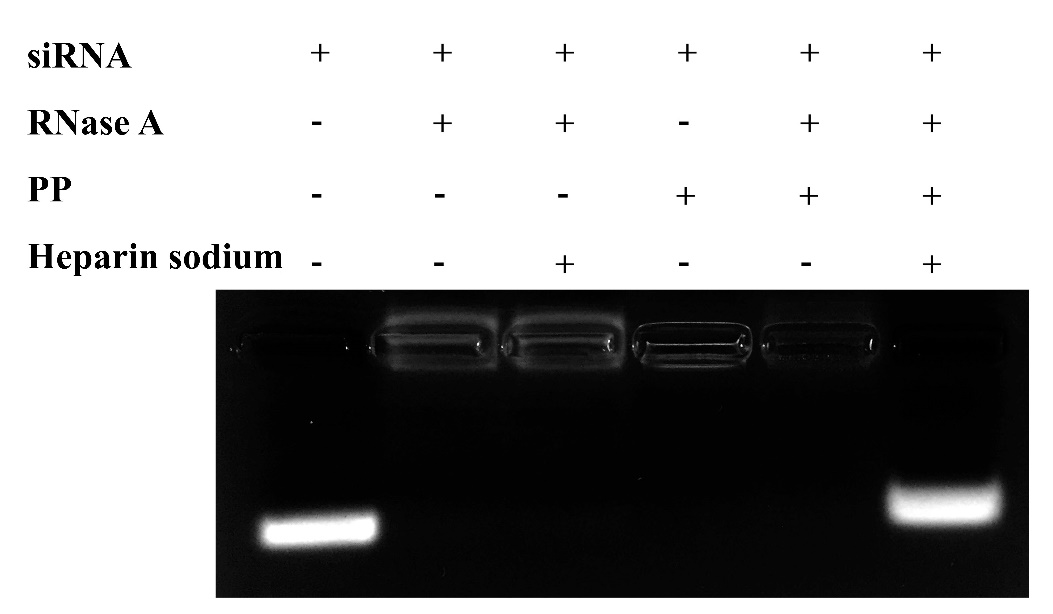


**Figure S2.** The protection assay of PP for siPlk-1 against the degradation of RNase A, in which PP/siPlk-1 nanoparticles were prepared at a N/P ratio of 3.0.


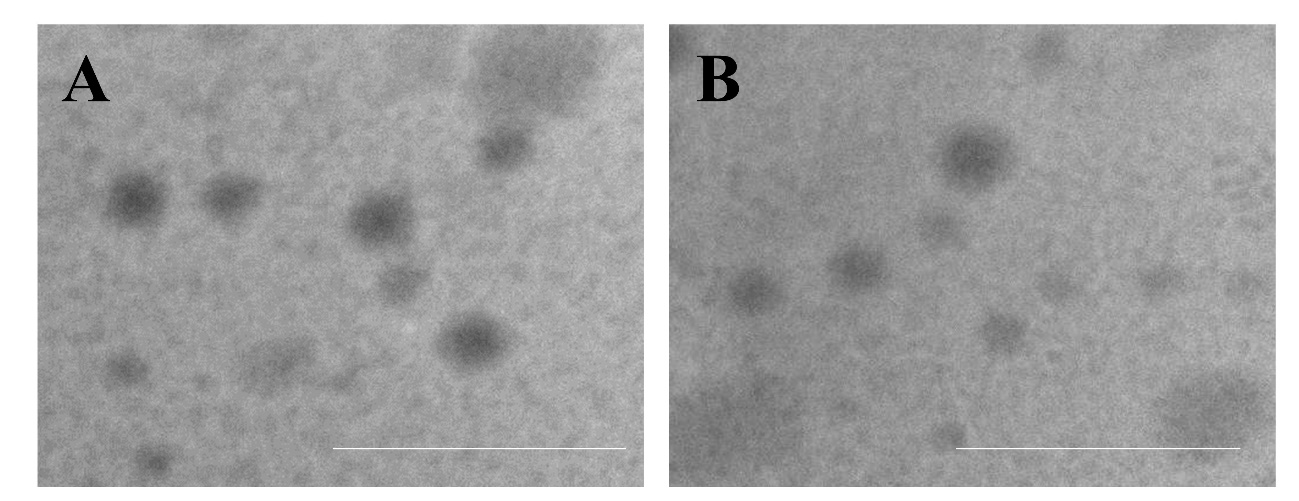


**Figure S3.** TEM images of PP/siPlk-1 (A) and PAMAM/siPlk-1 (B) nanoparticles (N/P ratio of 30, 0.5 μg/mL siPlk-1). The scale bar was 500 nm.


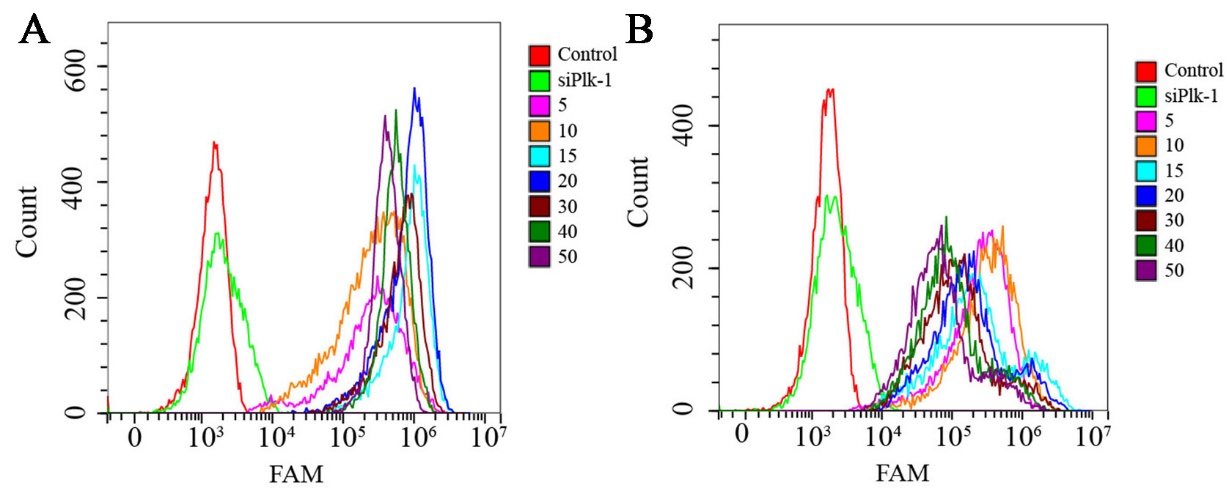


**Figure S4.** Transfection efficiency evaluation of PP/siPlk-1 (A) and PAMAM/siPlk-1 (B) nanoparticles at different N/P ratios (5 to 50).


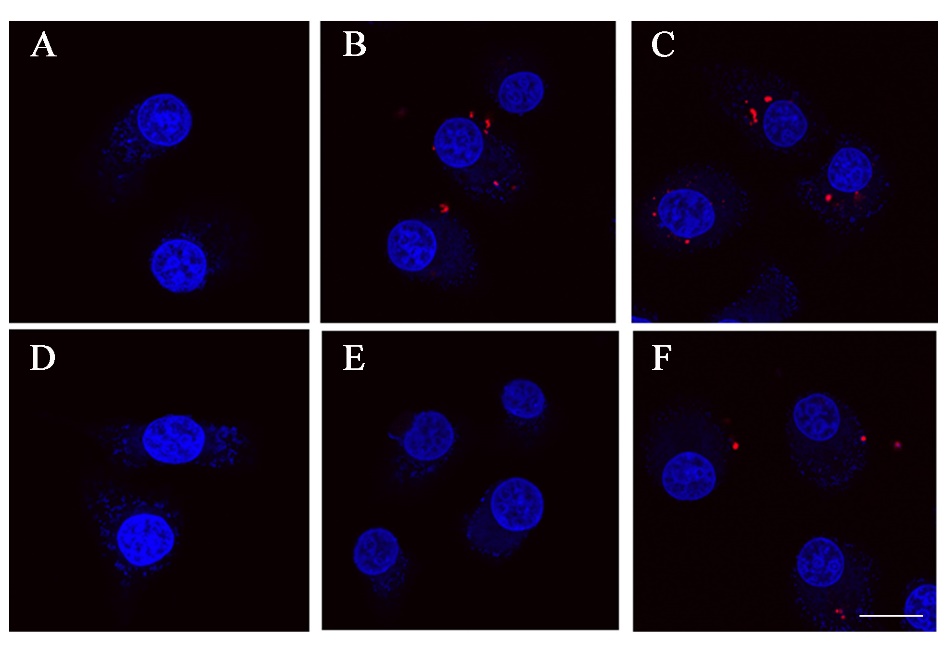


**Figure S5.** Tumor-targeting ability of PP/siPlk-1 nanoparticles evaluated by CLSM: (A) Control, (B) PP/siPlk-1, (C) PAMAM/siPlk-1, (D) siPlk-1, (E) PP/siPlk-1 with PBA pretreatment and (F) PAMAM/siPlk-1 with PBA pretreatment. The sale bar is 20 µm.

Blue: DAPI, nucleus; red: Cy5.5-labelled siPlk-1.


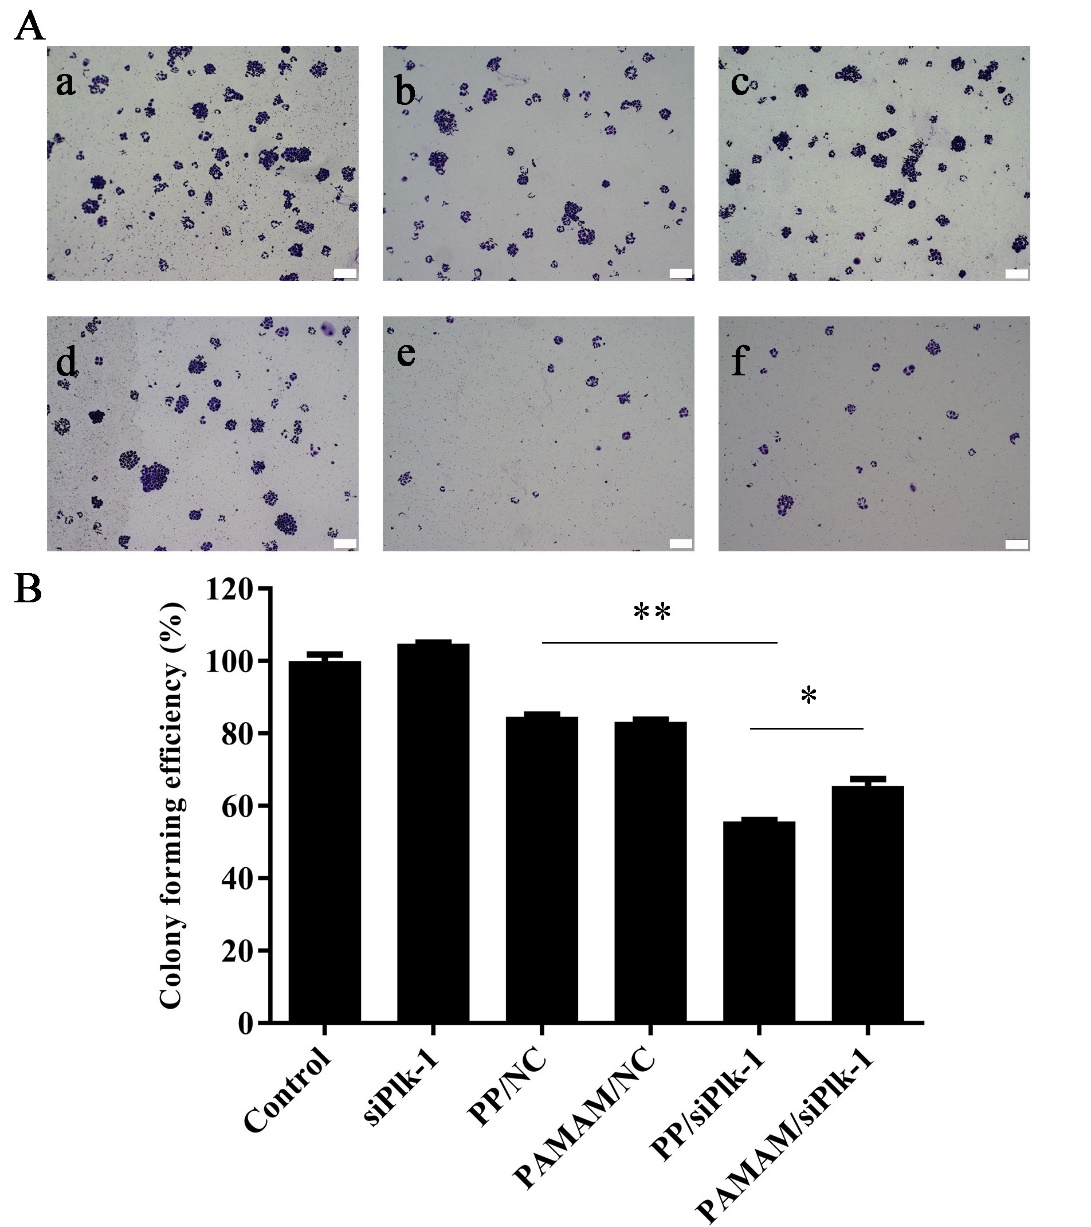


**Figure S6.** Colony formation assay of HepG2 cells after the transfection of siPlk-1 (A) and the quantitative analysis (B): (a) Control, (b) PP/NC, (c) PAMAM/NC, (d) siPlk-1, (e) PP/siPlk-1 and (f) PAMAM/siPlk-1. The scale bar was 200 µm. Data were presented as mean value ± SD of triplicate experiments (**p* < 0.05, ***p* < 0.01).


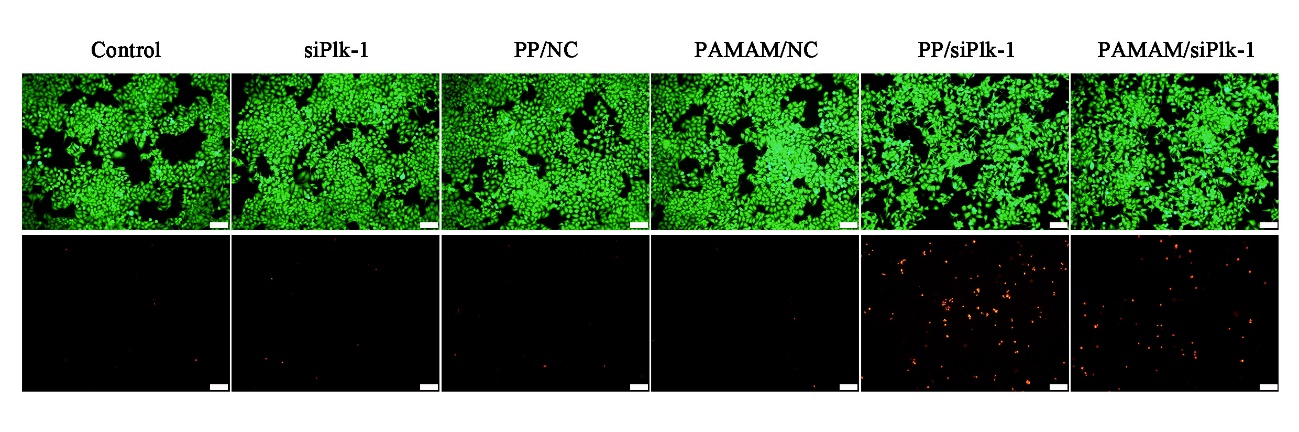


**Figure S7.** Live/dead staining of HepG2 cells after the siPlk-1 transfection. The upper images represented the live cells stained by calcein AM (green), and the lower ones were the dead ones stained by ethidium homodimer. The scale bar was 100 µm.


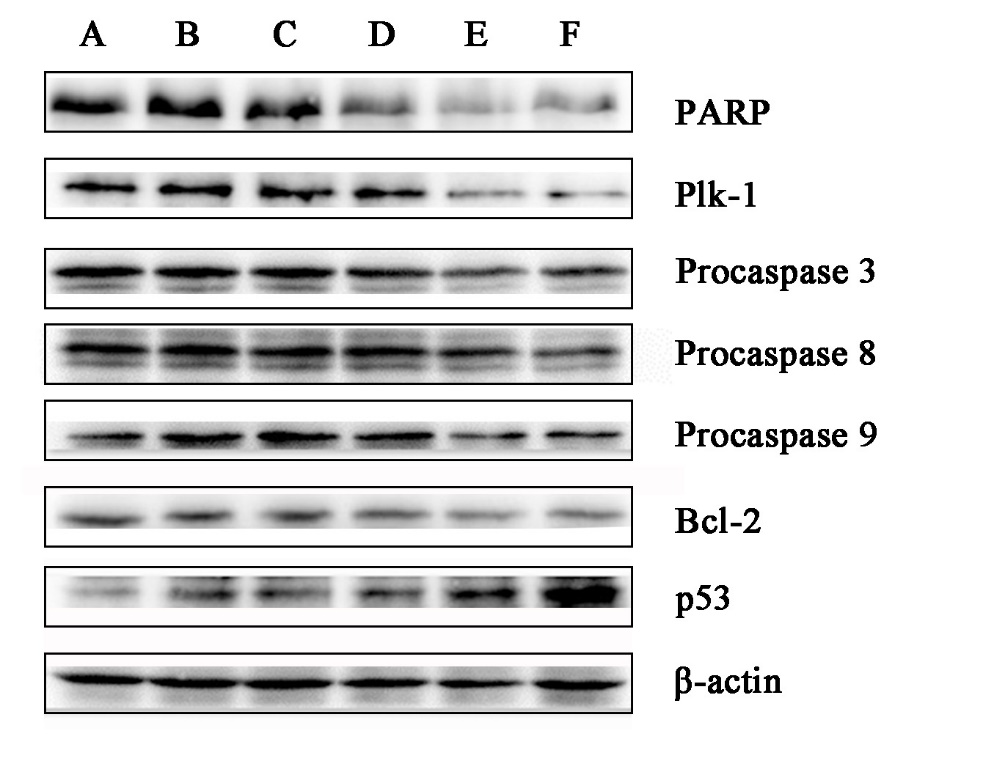


**Figure S8.** The expression levels of Plk-1 and the apoptosis-related proteins by western blotting analysis: (A) control, (B) siPlk-1, (C) PAMAM/NC, (D) PP/NC, (E) PAMAM/siPlk-1, (F) PP/siPlk-1.


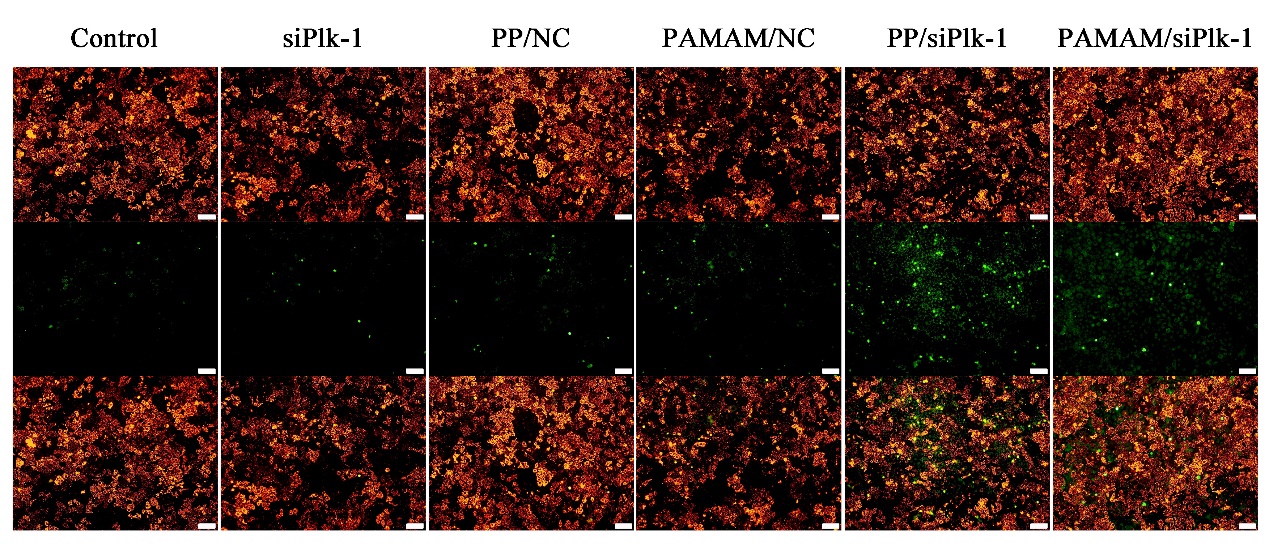


**Figure S9.** [Mitochondrial](javascript:;) [membrane](javascript:;) [potential](javascript:;) of HepG2 cells after the carriers-mediated siPlk-1 transfection. Images in the first row and the second row represented the cells with high and low [mitochondrial](javascript:;) [membrane](javascript:;) [potential](javascript:;), respectively. The merged images were shown in the third row. The scale bar was 100 µm.


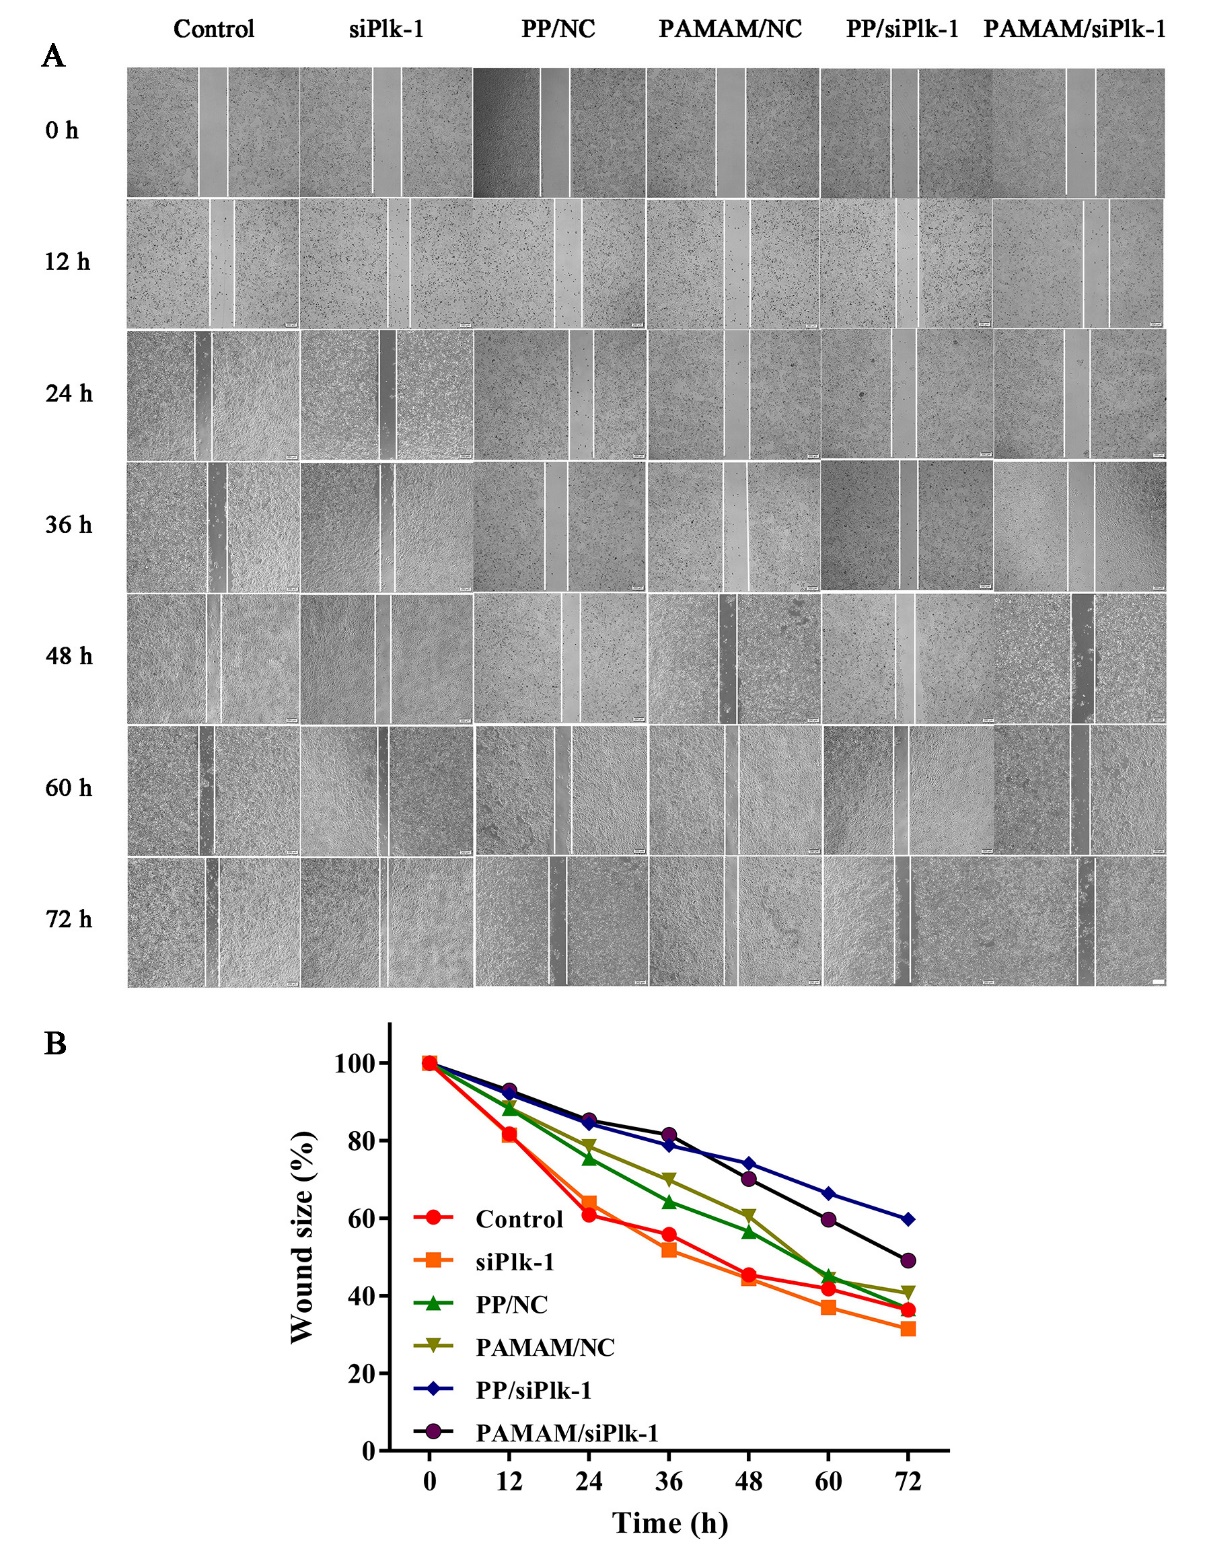


**Figure S10.** Wound healing assay of HepG2 cells after siPlk-1 transfection (A) and the quantification of wound size (B). The scale bar was 200 µm.

**Table S1**. Hydrodynamic diameter and zeta potential of PP/siPlk-1 and PAMAM/siPlk-1 nanoparticles at different N/P ratios. Data were presented as mean value ± SD of triplicate experiments.

| Nanoparticles | N/P ratio | Hydrodynamic diameter (nm) | PDI | Zeta potential  (mV) |
| --- | --- | --- | --- | --- |
| PAMAM/siPlk-1 | PAMAM | 474.37 ± 65.96 | 0.635 | +36.13 ± 4.63 |
| 10:1 | 261.93 ± 5.14 | 0.369 | -4.58 ± 1.59 |
| 20:1 | 216.43 ± 13.00 | 0.635 | +11.67 ± 1.01 |
| 30:1 | 203.90 ± 33.34 | 0.473 | +16.03 ± 3.79 |
| 40:1 | 187.50 ± 16.30 | 0.336 | +26.73 ± 1.00 |
| 50:1 | 170.80 ± 18.26 | 0.392 | +30.67 ± 2.75 |
| PP/siPlk-1 |  |  |  |  |
| PP | 520.67 ± 67.09 | 0.759 | +35.23 ± 2.33 |
| 10:1 | 252.70 ± 38.42 | 0.435 | -0.49 ± 1.96 |
| 20:1 | 226.30 ± 29.25 | 0.672 | +11.87 ± 2.83 |
| 30:1 | 209.40 ± 24.21 | 0.395 | +16.77 ± 2.35 |
| 40:1 | 187.77 ± 45.49 | 0.404 | +23.37 ± 3.94 |
| 50:1 | 185.40 ± 34.14 | 0.474 | +29.33 ± 0.90 |
